# Supplementary material
Source: PubMed Central journal article supplement (PMC3348612)
Supplement: NIHMS374000-supplement-Supplemental_tables.pdf [file NIHMS374000-supplement-Supplemental_tables.pdf]

Supplementary Tables for: "Role of inflammatory-related gene expression in clear cell renal cell carcinoma development and clinical outcomes"

Weiqi Tan, Michelle A.T. Hildebrandt, Xia Pu, Maosheng Huang, Jie Lin, Surena F. Matin, Pheroze Tamboli, Christopher G. Wood, and Xifeng Wu. J Urol, 2011.

**Supplementary Table 1.** Association of inflammation-related genes with recurrence in the discovery population using expression microarrays

| Gene           | Expression | Recurrence |           |                    | P-value |
|----------------|------------|------------|-----------|--------------------|---------|
|                |            | No. n(%)   | Yes. n(%) | HR* (95%CI)        |         |
| <i>BLNK</i>    | Low        | 33(64.71)  | 4(19.05)  | 1(reference)       | 0.0015  |
|                | High       | 18(35.29)  | 17(80.95) | 19.05(3.10-117.19) |         |
| <i>IL8</i>     | Low        | 38(74.51)  | 8(38.10)  | 1(reference)       | 0.0019  |
|                | High       | 13(25.49)  | 13(61.90) | 7.42(2.09-26.37)   |         |
| <i>CXCL1</i>   | Low        | 35(68.63)  | 5(23.81)  | 1(reference)       | 0.0023  |
|                | High       | 16(31.37)  | 16(76.19) | 7.08(2.01-24.92)   |         |
| <i>C1R</i>     | Low        | 29(56.86)  | 7(33.33)  | 1(reference)       | 0.0030  |
|                | High       | 22(43.14)  | 14(66.67) | 8.87(2.10-37.46)   |         |
| <i>MMP9</i>    | Low        | 39(76.47)  | 12(57.14) | 1(reference)       | 0.0035  |
|                | High       | 12(23.53)  | 9(42.86)  | 8.19(2.00-33.59)   |         |
| <i>GADD45G</i> | Low        | 42(82.35)  | 13(61.90) | 1(reference)       | 0.0037  |
|                | High       | 9(17.65)   | 8(38.10)  | 8.95(2.04-39.27)   |         |
| <i>SOD2</i>    | Low        | 29(56.86)  | 6(28.57)  | 1(reference)       | 0.0046  |
|                | High       | 22(43.14)  | 15(71.43) | 9.40(1.99-44.28)   |         |
| <i>MUC1</i>    | Low        | 31(60.78)  | 5(23.81)  | 1(reference)       | 0.0070  |
|                | High       | 20(39.22)  | 16(76.19) | 35.30(4.49-277.28) |         |
| <i>APP</i>     | Low        | 14(27.45)  | 10(47.62) | 1(reference)       | 0.0075  |
|                | High       | 37(72.55)  | 11(52.38) | 0.19(0.058-0.64)   |         |
| <i>ADORA3</i>  | Low        | 17(33.33)  | 5(23.81)  | 1(reference)       | 0.011   |
|                | High       | 34(66.67)  | 16(76.19) | 16.35(1.92-139.42) |         |
| <i>NR2F1</i>   | Low        | 21(41.18)  | 15(71.43) | 1(reference)       | 0.017   |
|                | High       | 30(58.82)  | 6(28.57)  | 0.22(0.064-0.77)   |         |
| <i>CARD9</i>   | Low        | 29(56.86)  | 8(38.10)  | 1(reference)       | 0.019   |
|                | High       | 22(43.14)  | 13(61.90) | 6.16(1.35-28.00)   |         |
| <i>BMP4</i>    | Low        | 31(60.78)  | 18(85.71) | 1(reference)       | 0.023   |
|                | High       | 20(39.22)  | 3(14.29)  | 0.16(0.033-0.77)   |         |
| <i>KLK1</i>    | Low        | 14(27.45)  | 6(28.57)  | 1(reference)       | 0.025   |
|                | High       | 37(72.55)  | 15(71.43) | 4.95(1.22-20.10)   |         |
| <i>IL10RA</i>  | Low        | 29(56.86)  | 8(38.10)  | 1(reference)       | 0.026   |
|                | High       | 22(43.14)  | 13(61.90) | 5.27(1.22-22.74)   |         |
| <i>MEF2C</i>   | Low        | 7(13.73)   | 10(47.62) | 1(reference)       | 0.033   |
|                | High       | 44(86.27)  | 11(52.38) | 0.31(0.11-0.91)    |         |
| <i>PDE2A</i>   | Low        | 15(29.41)  | 16(76.19) | 1(reference)       | 0.034   |
|                | High       | 36(70.59)  | 5(23.81)  | 0.26(0.077-0.91)   |         |
| <i>ANGPTL4</i> | Low        | 39(76.47)  | 15(71.43) | 1(reference)       | 0.046   |
|                | High       | 12(23.53)  | 6(28.57)  | 0.21(0.046-0.97)   |         |

Abbreviations: HR, Hazard ratio; CI, Confidence interval

\*, adjusted for age at diagnosis, gender, BMI, family history of cancer, race, hypertension, smoking status, and stage

High and Low expression cut-off was determined using spline modeling

Highlighted genes were also significantly associated with survival.

**Supplementary Table 2.** Results for recurrence and overall survival in the validation population using qRT-PCR

| Gene           | Expression | Recurrence |           |                 | P-value |
|----------------|------------|------------|-----------|-----------------|---------|
|                |            | No. n(%)   | Yes. n(%) | HR* (95%CI)     |         |
| <i>BLNK</i>    | Low        | 90(53.57)  | 25(40.98) | 1(reference)    | 0.73    |
|                | High       | 78(46.43)  | 36(59.02) | 1.12(0.59-2.11) |         |
| <i>IL8</i>     | Low        | 130(76.47) | 31(50.82) | 1(reference)    | 0.72    |
|                | High       | 40(23.53)  | 30(49.18) | 1.12(0.61-2.06) |         |
| <i>CXCL1</i>   | Low        | 95(56.21)  | 24(39.34) | 1(reference)    | 0.46    |
|                | High       | 74(43.79)  | 37(60.66) | 1.26(0.68-2.36) |         |
| <i>C1R</i>     | Low        | 93(54.71)  | 25(40.98) | 1(reference)    | 0.46    |
|                | High       | 77(45.29)  | 36(59.02) | 1.25(0.69-2.28) |         |
| <i>MMP9</i>    | Low        | 91(54.17)  | 26(42.62) | 1(reference)    | 0.98    |
|                | High       | 77(45.83)  | 35(57.38) | 1.01(0.55-1.83) |         |
| <i>GADD45G</i> | Low        | 127(75.60) | 43(70.49) | 1(reference)    | 0.034   |
|                | High       | 41(24.40)  | 18(29.51) | 2.09(1.06-4.14) |         |
| <i>SOD2</i>    | Low        | 85(50.00)  | 32(52.46) | 1(reference)    | 0.49    |
|                | High       | 85(50.00)  | 29(47.54) | 1.24(0.67-2.30) |         |

|               |      |            |           |                 |      |
|---------------|------|------------|-----------|-----------------|------|
| <i>MUC1</i>   | Low  | 88(51.76)  | 27(44.26) | 1(reference)    | 0.94 |
|               | High | 82(48.24)  | 34(55.74) | 0.98(0.54-1.77) |      |
| <i>APP</i>    | Low  | 58(34.12)  | 19(31.15) | 1(reference)    | 0.41 |
|               | High | 112(65.88) | 42(68.85) | 1.31(0.69-2.50) |      |
| <i>ADORA3</i> | Low  | 59(35.54)  | 18(30.00) | 1(reference)    | 0.43 |
|               | High | 107(64.46) | 42(70.00) | 0.76(0.38-1.50) |      |
| <i>NR2F1</i>  | Low  | 81(47.93)  | 33(54.10) | 1(reference)    | 0.74 |
|               | High | 88(52.07)  | 28(45.90) | 1.11(0.60-2.06) |      |
| <i>CARD9</i>  | Low  | 92(56.10)  | 23(37.70) | 1(reference)    | 0.76 |
|               | High | 72(43.90)  | 38(62.30) | 1.10(0.59-2.05) |      |
| <i>BMP4</i>   | Low  | 78(44.15)  | 40(65.57) | 1(reference)    | 0.42 |
|               | High | 91(55.85)  | 21(34.43) | 0.76(0.40-1.47) |      |
| <i>KLK1</i>   | Low  | 57(51.82)  | 15(45.45) | 1(reference)    | 0.87 |
|               | High | 53(48.18)  | 18(54.55) | 0.93(0.40-2.15) |      |
| <i>IL10RA</i> | Low  | 86(50.59)  | 31(50.82) | 1(reference)    | 0.35 |
|               | High | 84(49.41)  | 30(49.18) | 1.34(0.73-2.44) |      |

| Gene          | Expression | Death      |           |                 | P-value      |
|---------------|------------|------------|-----------|-----------------|--------------|
|               |            | No. n(%)   | Yes. n(%) | HR* (95%CI)     |              |
| <i>ADORA3</i> | Low        | 152(77.95) | 37(64.91) | 1(reference)    | 0.71         |
|               | High       | 43(22.05)  | 20(35.09) | 1.16(0.54-2.51) |              |
| <i>CARD9</i>  | Low        | 139(71.65) | 29(50.88) | 1(reference)    | <b>0.010</b> |
|               | High       | 55(28.35)  | 28(49.12) | 2.52(1.24-5.12) |              |
| <i>CRADD</i>  | Low        | 100(50.25) | 28(49.12) | 1(reference)    | 0.39         |
|               | High       | 99(49.75)  | 29(50.88) | 1.34(0.69-2.59) |              |
| <i>NCF2</i>   | Low        | 104(52.00) | 25(43.86) | 1(reference)    | <b>0.023</b> |
|               | High       | 96(48.00)  | 32(56.14) | 2.26(1.12-4.58) |              |
| <i>SOCS1</i>  | Low        | 108(54.00) | 21(36.84) | 1(reference)    | 0.20         |
|               | High       | 92(46.00)  | 36(63.16) | 1.48(0.81-2.70) |              |
| <i>EBI3</i>   | Low        | 103(52.55) | 24(42.11) | 1(reference)    | 0.80         |
|               | High       | 93(47.45)  | 33(57.89) | 0.92(0.49-1.73) |              |
| <i>CITTA</i>  | Low        | 122(61.00) | 33(57.89) | 1(reference)    | <b>0.037</b> |
|               | High       | 78(39.00)  | 24(42.11) | 2.11(1.05-4.27) |              |

Abbreviations: HR, Hazard ratio; CI, Confidence interval

\*, adjusted for age at diagnosis, gender, BMI, family history of cancer, race, hypertension, smoking status, and stage

High and Low expression cut-off was determined using spline modeling.
